# Supplementary material for: Extended air, light, and heat-resistive organolead halide perovskite single-crystalline microrods for high-performance photodetectors
Source: Royal Society of Chemistry journal article supplement (doi:10.1039/d2ma00602b), 2022-01-01
Supplement: d2ma00602b1.pdf [file d2ma00602b1.pdf]

**Extended Air, Light, and Heat Resistive Organolead Halide Perovskite Single-Crystalline  
Microrods for High-Performance Photodetector**

Chang-Yu Lin,<sup>a,b\*</sup> Rajesh Kumar Ulaganathan,<sup>c,d,e</sup> Ambika Subramanian,<sup>a</sup> Huei Chu Weng,<sup>a</sup>

Yaw-Jen Chang,<sup>a</sup> Raghavan Chinnambedu Murugesan,<sup>f</sup> Raman Sankar,<sup>c</sup> and Alex Rozhin<sup>f</sup>

<sup>a</sup>Department of Mechanical Engineering, Chung Yuan Christian University, Taoyuan-32023, Taiwan.

e-mail: [cylin@cycu.edu.tw](mailto:cylin@cycu.edu.tw)

<sup>b</sup>Research Center for Semiconductor Materials and Advanced Optics, Chung Yuan Christian University, Taoyuan-32023, Taiwan.

<sup>c</sup>Institute of Physics, Academia Sinica, Taipei-11529, Taiwan.

<sup>d</sup>Center for Condensed Matter Sciences, National Taiwan University, Taipei-10617, Taiwan

<sup>e</sup>Department of Electrical and Photonics Engineering, Technical University of Denmark, Roskilde-4000, Denmark

<sup>f</sup>Aston Institute of Photonic Technologies, Aston University, Birmingham- B4 7ET, UK.

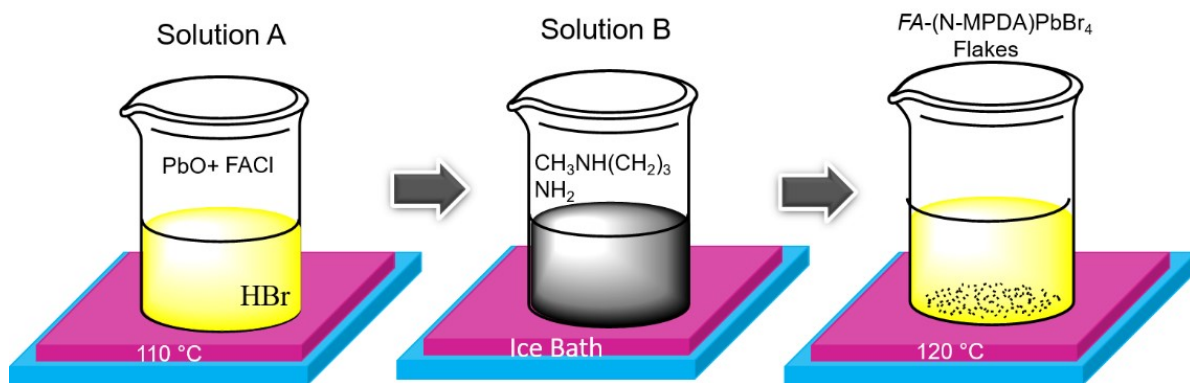

Fig. S1. Diagrammatic view of the synthesis of FA-(N-MPDA)PbBr<sub>4</sub> flakes.

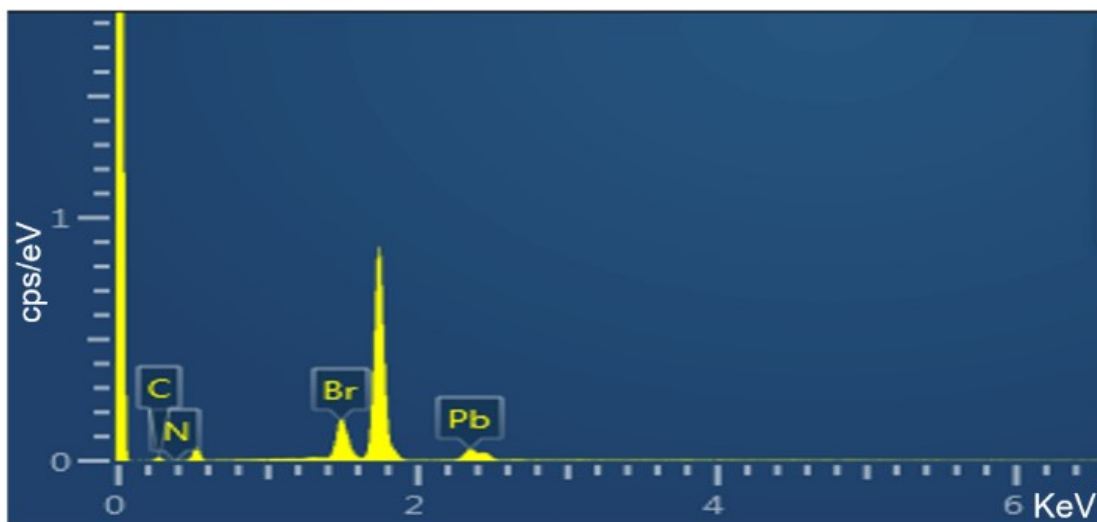

Fig. S2. EDS spectrum of as-grown FA-(N-MPDA)PbBr<sub>4</sub> single crystal.

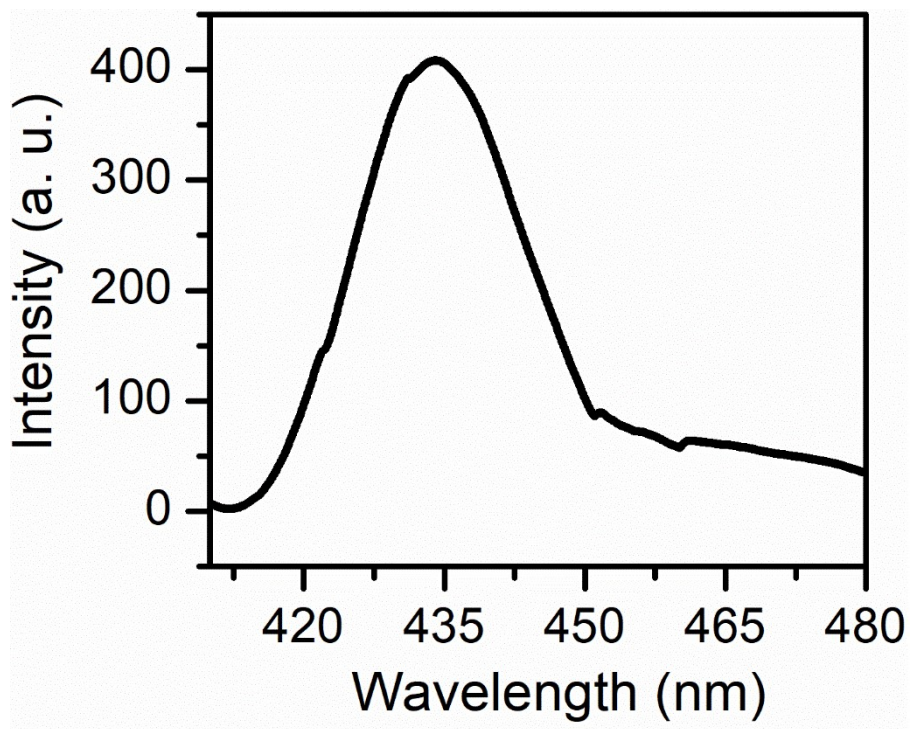

Fig. S3. The emission spectrum of (N-MPDA)PbBr<sub>4</sub> single crystal.

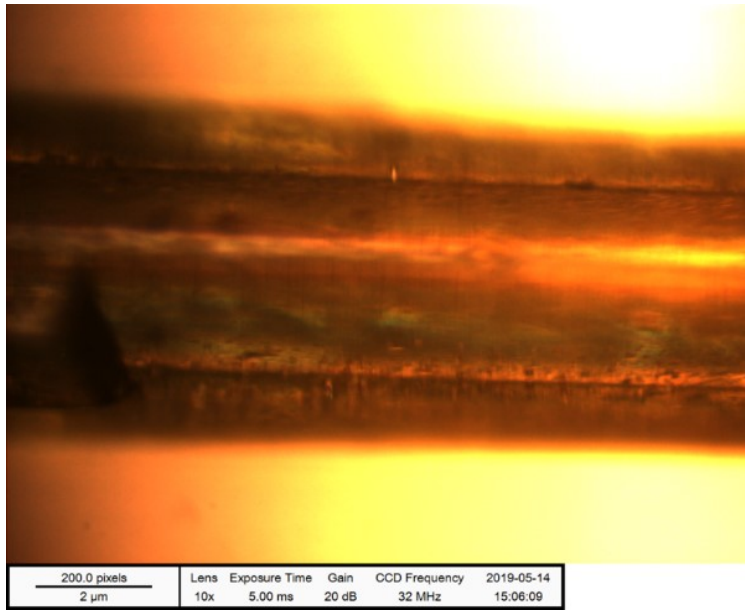

Fig. S4. Optical microscopy image of FA-(N-MPDA)PbBr<sub>4</sub> single crystal.

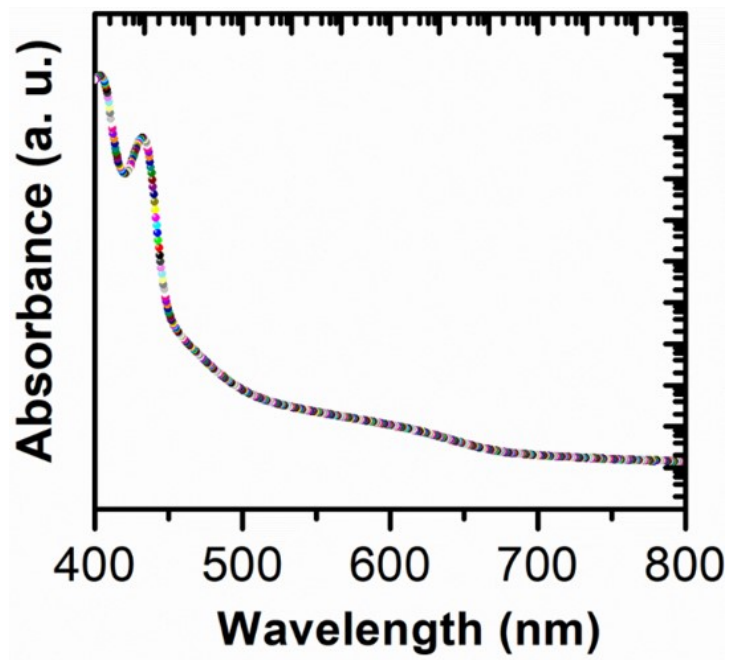

Fig. S5. The absorption spectrum for bulk FA-(N-MPDA)PbBr<sub>4</sub> single crystal was observed between 400-800 nm.

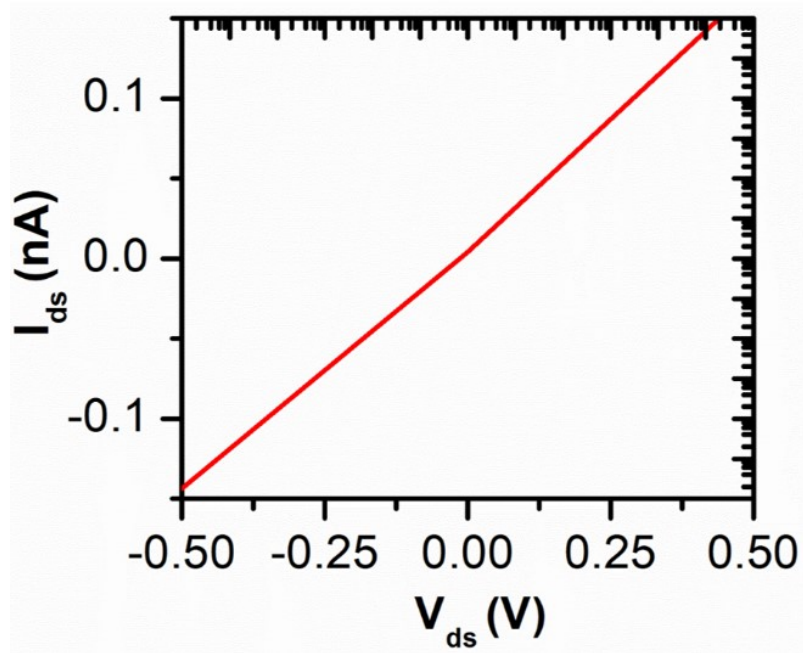

Fig. S6. The  $I_{ds}$ - $V_{ds}$  characteristic curves of the FA-(N-MPDA)PbBr<sub>4</sub>-FET measured between -0.5 to 0.5 V.

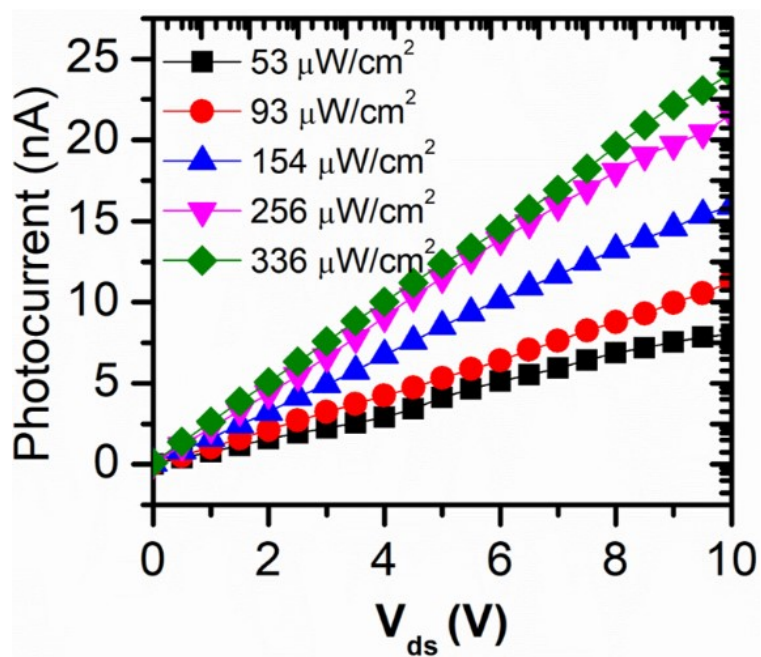

Fig. S7. The photocurrent ( $I_{ph}$ ) is plotted as the incident laser power function with varying  $V_{ds}$  from 0 to 10 V.



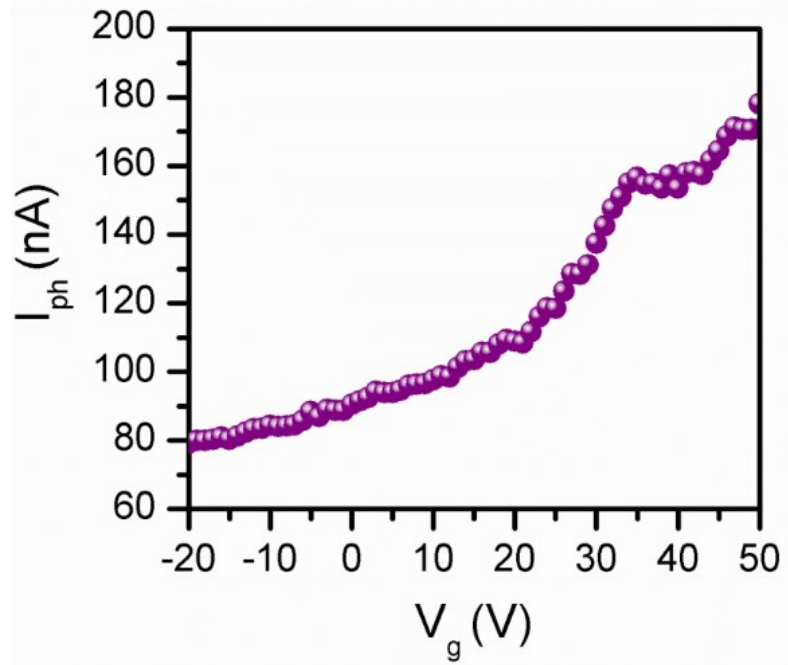

Fig. S8. The  $I_{ph}$  is plotted versus varying  $V_g$  from -20 to 50 V at constant  $V_{ds}$  of 10V under incident laser power of 140 mW.

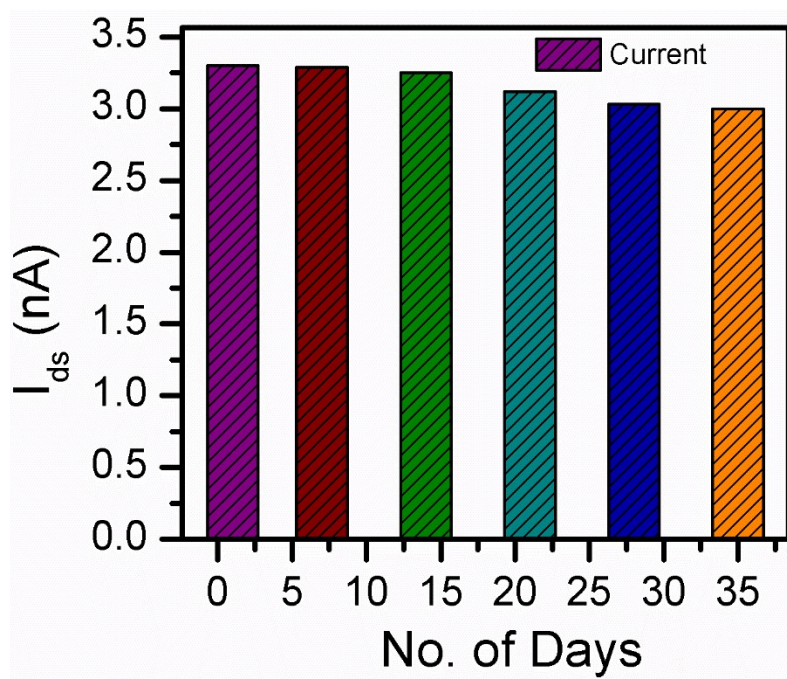

Fig. S9. Long-term stability of FA-(N-MPDA)PbBr<sub>4</sub>-FET vs. different days.

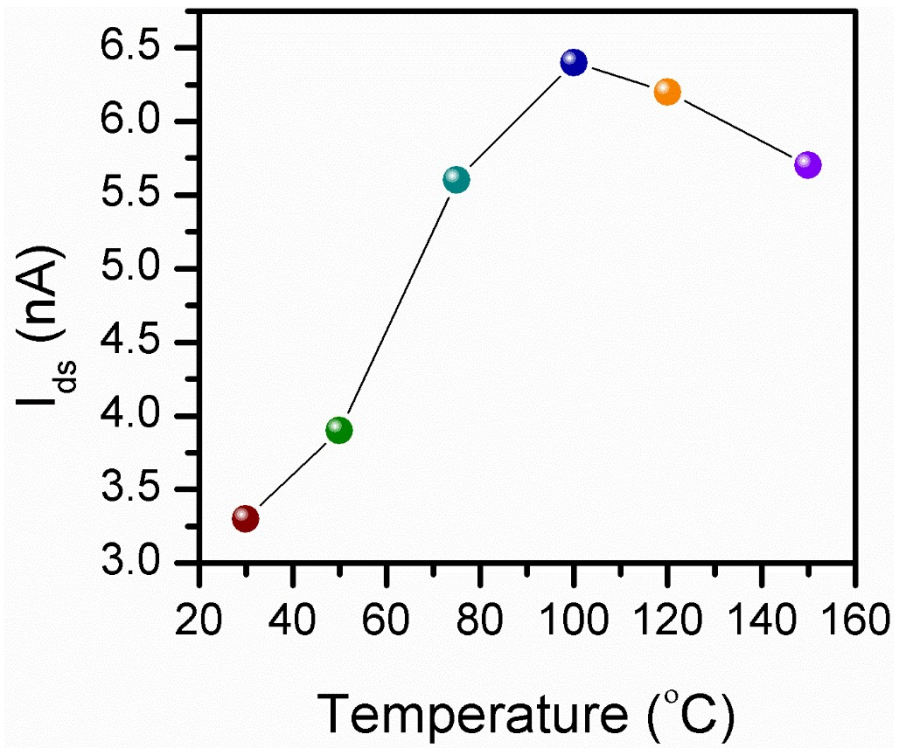

Fig. S10. Thermal stability of FA-(N-MPDA)PbBr<sub>4</sub>-FET device at 10 V of  $V_{ds}$ .
